# Supplementary material for: Dhh1 promotes autophagy-related protein translation during nitrogen starvation
Source: PLoS Biol. 2019 Apr 11;17(4):e3000219. doi: 10.1371/journal.pbio.3000219 (PMC6459490; doi:10.1371/journal.pbio.3000219)
Supplement: S1 Data — WT or vehicle (DMSO)-only values were set to 1.0 (or to 100%), and other values were normalized to the WT where indicated. DMSO, dimethyl sulfoxide; WT, wild type. (XLSX) [file pbio.3000219.s011.xlsx]

## Sheet: Fig 1C
		Free GFP/Total GFP
		#1	#2	#3		Average	SD	p Value
	WT 1 d	0.421517	0.507961	0.344945		0.424808	0.0815578
	WT 3 d	0.411899	0.494332	0.323038		0.409756	0.0856667
	dhh1∆ 1 d	0.0821381	0.153023	0.111401		0.115521	0.0356216	0.00383716
	dhh1∆ 3 d	0.0492954	0.135952	0.0702594		0.085169	0.0452114	0.00438375

## Sheet: Fig 1D
#1
	GFP/Pgk1	Normalize to WT				Average	SD	p Value
WT+empty	2.43981	1			WT+empty	1	0
dhh1∆+empty	0.674988	0.276656			dhh1∆+empty	0.335019	0.0631055	5.30029e-05
dhh1∆+Dhh1-PA	1.43806	0.589415			dhh1∆+Dhh1-PA	0.781215	0.167928	0.0125657
#2
WT+empty	3.91613	1
dhh1∆+empty	1.57423	0.401985
dhh1∆+Dhh1-PA	3.33821	0.852426
#3
WT+empty	6.3712	1
dhh1∆+empty	2.07967	0.326417
dhh1∆+Dhh1-PA	5.74557	0.901804

## Sheet: Fig 1E
#1
	GFP/Pgk1	Normalized to DMSO group				Average	SD	p Value
WT+GFP-Atg8; DMSO	1.39887	1			WT+GFP-Atg8; DMSO	1	0
WT+GFP-Atg8; IAA	1.62156	1.15919			WT+GFP-Atg8; IAA	1.07795	0.0963021	0.233539
Dhh1-AID+GFP-Atg8; DMSO	2.02748	1			Dhh1-AID+GFP-Atg8; DMSO	1	0
Dhh1-AID+GFP-Atg8; IAA	1.16273	0.573488			Dhh1-AID+GFP-Atg8; IAA	0.457907	0.103585	0.000821029
#2
WT+GFP-Atg8; DMSO	0.851007	1
WT+GFP-Atg8; IAA	0.826816	0.971574
Dhh1-AID+GFP-Atg8; DMSO	0.602204	1
Dhh1-AID+GFP-Atg8; IAA	0.257005	0.426774
#3
WT+GFP-Atg8; DMSO	2.43874	1
WT+GFP-Atg8; IAA	2.69015	1.10309
Dhh1-AID+GFP-Atg8; DMSO	2.52609	1
Dhh1-AID+GFP-Atg8; IAA	0.94339	0.373459

## Sheet: Fig 2A
#1
	Atg1/Pgk1	Normalized to WT				Average	SD	p Value
WT	0.609451	1			WT	1	0
dhh1∆	0.193064	0.316783			dhh1∆	0.323709	0.0441661	1.20123e-05
#2
WT	3.47336	1
dhh1∆	1.28837	0.370929
#3
WT	1.51841	1
dhh1∆	0.430339	0.283415

## Sheet: Fig 2B
Relative Atg13 protein level
	#1	#2	#3			Average	SD	p Value
WT	100	100	100	(percentage)		100	0
dhh1∆	53.1121	61.5224	54.2362			56.2902	4.56588	7.74884e-05

## Sheet: Fig 2C
Relative mRNA level	WT			dhh1∆
	#1	#2	#3	#1	#2	#3
ATG1	1	1	1	0.776543	0.937923	0.934943
ATG13	1	1	1	0.698058	0.745055	1.15054
	WT			dhh1∆
	Average	SD		Average	SD		p Value
ATG1	1	0		0.883136	0.0923248		0.0934405
ATG13	1	0		0.86455	0.248784		0.399068

## Sheet: Fig 2D
#1
	Atg1/Pgk1	Normalized to DMSO group				average	SD		p value
WT; DMSO	0.45888	1			WT; DMSO	1	0
WT; IAA	0.463646	1.01039			WT; IAA	1.11688	0.144451		0.233714
Dhh1-AID; DMSO	0.333245	1			Dhh1-AID; DMSO	1	0
Dhh1-AID; IAA	0.160272	0.480944			Dhh1-AID; IAA	0.45485	0.123108		0.00155347
#2
WT; DMSO	0.84923	1
WT; IAA	0.899283	1.05894
Dhh1-AID; DMSO	0.688401	1
Dhh1-AID; IAA	0.387445	0.562819
#3
WT; DMSO	0.167133	1
WT; IAA	0.214148	1.2813
Dhh1-AID; DMSO	0.199006	1
Dhh1-AID; IAA	0.0638386	0.320787

## Sheet: Fig 3B
Relative mRNA fragment enrichment
	ATG1 position	-480	-290	35	800	2340	3UTR	ALG9
#1		7.05733	5.31147	3.68329	2.76042	6.99025	8.66254	2.27129
#2		7.9509	5.61433	4.35065	4.67417	7.96303	9.28953	2.78371
#3		5.62879	5.22764	3.7852	3.52251	5.46385	7.49944	1.61109
	average	6.87901	5.38448	3.93972	3.65236	6.80571	8.48383	2.22203
	SD	1.17128	0.20342	0.359512	0.963461	1.25977	0.908324	0.587859
	p value (relative to position 800)	0.0211119					0.0032069

## Sheet: Fig 3C
	Relative mRNA fragment enrichment
	ATG13 position	-10	1000	3'UTR	ALG9	(ALG9 values are the same to that in Fig 3B, because the experiments were done at the same qPCR plates.
#1		6.59634	3.32813	7.13951	2.27129
#2		7.72397	2.94252	6.70931	2.78371
#3		5.72081	3.82571	7.84035	1.61109
	Average	6.68037	3.36545	7.22972	2.22203
	SD	1.00422	0.442776	0.570894	0.587859
	p value (relative to position 1000)	0.00637707		0.00154966

## Sheet: Fig 3D
	Dhh1-PA	Atg1/Pgk1	Normalize to WT			average	SD		p value
#1	WT	0.762394	1		WT	1	0
	HRAA	0.368492	0.483335		HRAA	0.411487	0.0630418		8.55865e-05
#2	WT	7.25815	1
	HRAA	2.65234	0.365429
#3	WT	1.44032	1
	HRAA	0.555529	0.385697

[truncated: 14 more sheets: Fig 3E, Fig 4B, Fig 4C, Fig 4D, Fig 4E, Fig 6C, Fig 6D, Fig 6E, Fig 6F, Fig 6H, Fig S3C, Fig S3D, Fig S3E, Fig S4A]
